# Supplementary material
Source: PubMed Central journal article supplement (PMC4390002)
Supplement: Supp_Fig1.pdf [file Supp_Fig1.pdf]

## Supplementary Data

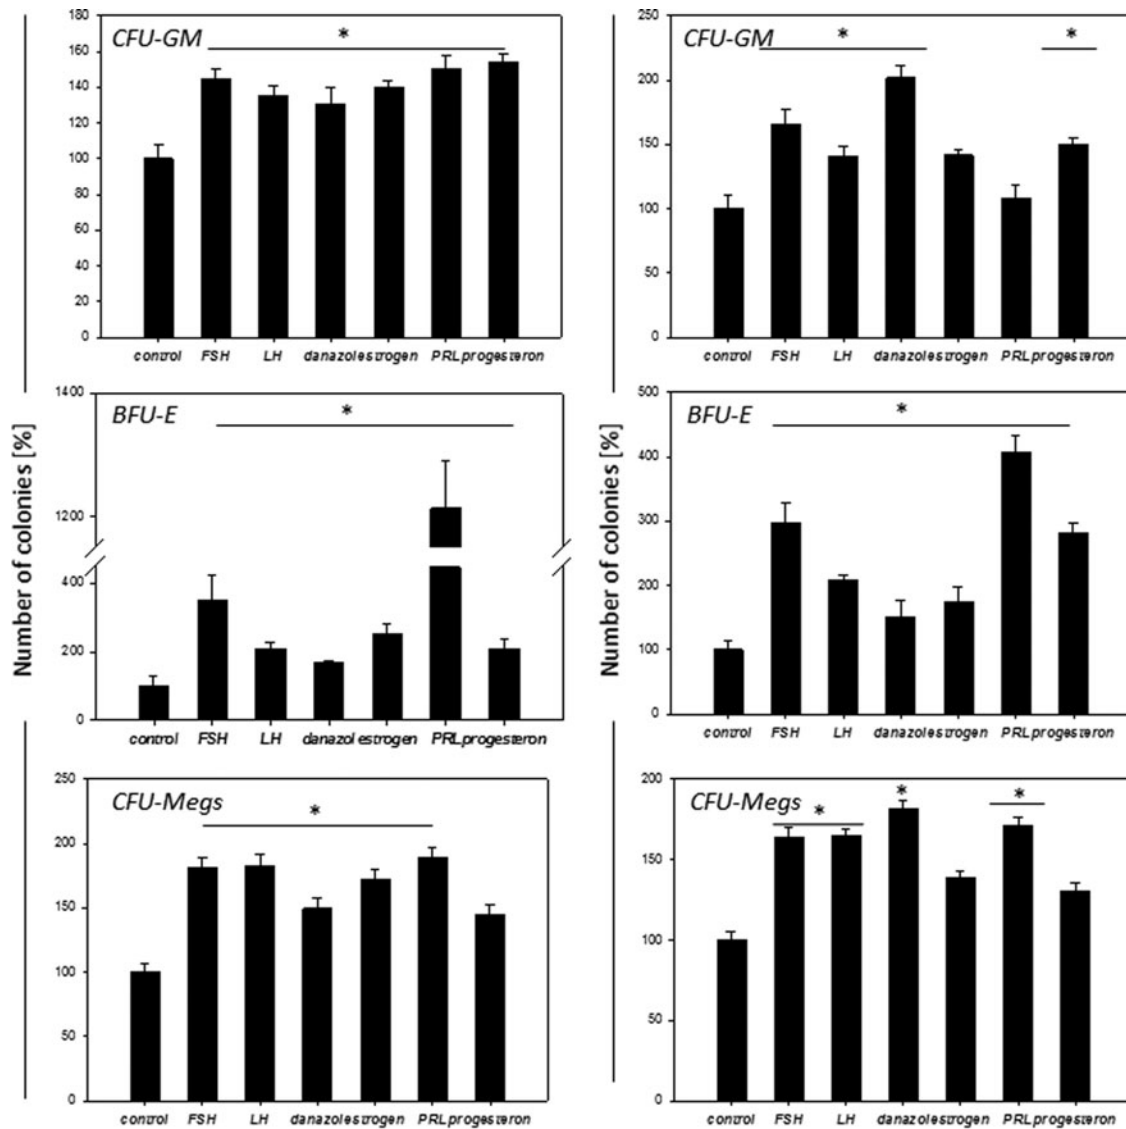

**SUPPLEMENTARY FIG. S1.** SexHs co-stimulate *in vitro* proliferation of murine Sca-1<sup>+</sup> cells if added with suboptimal (1/10) concentrations of colony-stimulating cytokines and growth factors. *Left panels:* female Sca-1<sup>+</sup> cell-derived CFU-GM, BFU-E, and CFU-Meg colonies; *right panels:* male Sca-1<sup>+</sup> cells-derived CFU-GM, BFU-E, and CFU-Meg colonies. Number of colonies formed in absence of SexH was assumed to be 100%. Data are combined from three independent experiments. \**P* < 0.05 compared with control group. BFU-E, erythrocyte burst-forming units; CFU-GM, granulocyte-macrophage colony-forming units.
