# Supplementary material
Source: PubMed Central journal article supplement (PMC4390002)
Supplement: Supp_Fig2.pdf [file Supp_Fig2.pdf]

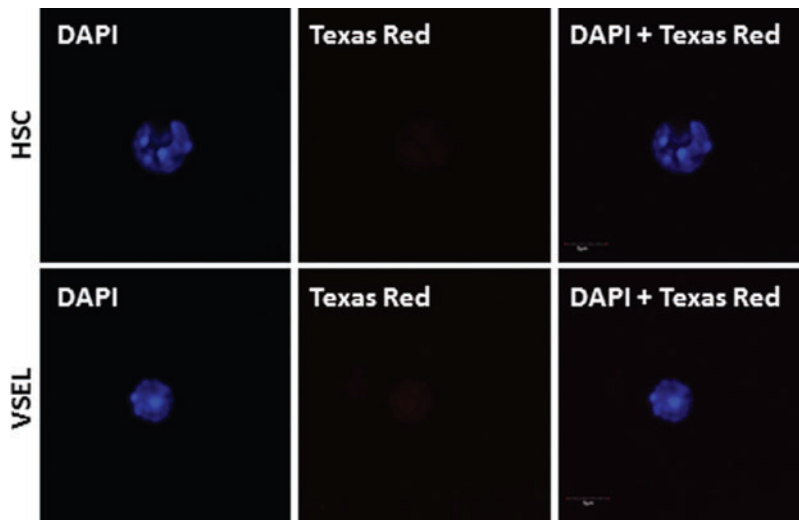

**SUPPLEMENTARY FIG. S2.** An example of control staining showing that secondary antibody conjugated with TexR does not bind to cells if primary antibody is not employed.
